# Supplementary material
Source: Springer Nature journal article supplement (https://www.springermedizin.de/resource/supplementary/12913_2011_2317_MOESM1_ESM.pdf/9529764)
Supplement: MOESM1 [file 9529764]

If the age of the resident is under 75 then enter "3" in the box  
otherwise, enter "0" >>>

Count the number of the following conditions that are true:

- age from 75 to 84
- intact on the Cognitive Performance Scale (score of 0 or 1)
- does not need task segmentation (MDS item G7=0)
- is any of the following: hemiplegic (I1v), paraplegic (I1x), or quadriplegic (I1z)
- involved in activities at least 1/3 of the time (N2=0 or 1)
- is not schizophrenic (I1gg=0)
- in RUG-III groups Physical A, Physical B, Behavior A, or Impaired Cognition A
- length of stay to date is less than two years (730 days) but at least 90 days
- prefers return to community (Q1a)
- support person positive about discharge (Q1b)

Multiply this count by "2" and enter in the box>>>

Count the number of the following conditions that are true:

- less than fully dependent on the ADL Hierarchy (score of 4 or less)
- impaired on the Cognitive Performance Scale (score of 2, 3, or 4)
- no communication problems (C4=0 and C6=0)
- no problems with any of the following: wandering (B4a=0), verbal abuse (B4b=0), physical abuse (B4c=0), socially inappropriate behavior (B4d=0)
- in RUG-III groups Physical C, D, or E; Behavior B; Impaired B; Clinically Complex A or B; and Rehabilitation Low A, High A, Very High A, or Ultra High A.

Enter the count in the box>>>

Q+ Index is the sum of the three boxes
